# Supplementary material for: Comprehensive Identification of Sexual Dimorphism-Associated Differentially Expressed Genes in Two-Way Factorial Designed RNA-Seq Data on Japanese Quail (Coturnix coturnix japonica)
Source: PubMed Central journal article supplement (PMC4587967; doi:10.1371/journal.pone.0139324), 2015-09-29
Supplement: pone.0139324.s003.pdf [file pone.0139324.s003.pdf]

**Table 1. Used primers for qRT-PCR experiments**

| Gene symbol  | Primers                | Strand | Product size |
|--------------|------------------------|--------|--------------|
| <b>CHD1</b>  | CTGAAAGGGAACAGCTGGAA   | +      | 165          |
|              | GCAACTTCCTGGCATCAAAT   | -      | 165          |
| <b>NIPBL</b> | CAGAAGCTCTGGTTCCTCC    | +      | 197          |
|              | TCAACAAGCTGAGTACAGGC   | -      | 197          |
| <b>VIP</b>   | GATGGCTGTAGACACTGGTG   | +      | 166          |
|              | GATGCAGCCAGTGAATCTGA   | -      | 166          |
| <b>HXC4</b>  | ATGGGTTGTTGGATGCTGT    | +      | 161          |
|              | CAAACACTACAGGAGGCCAACA | -      | 161          |
| <b>MYP0</b>  | CAGGAACGGAGCAGGTAAAA   | +      | 159          |
|              | CAAGAACCCTCCTGACATCG   | -      | 159          |

**Table 2. Primer details of Beta actin**

| Primer           | Sequence 5' - 3'     | Size | Tm   | NCBI       |
|------------------|----------------------|------|------|------------|
| Beta actin<br>LP | CGGTCAAGTCATCACCATTG | 197  | 54 C | AF199488.1 |
| Beta actin<br>RP | CACTGCCAGGGTACATTGTG |      |      |            |

**Table 3. The CT values of the qRT-PCR in the brain tissues of RBC breed**

| Target Name | Sample Name | Ct          | Ct Mean  |
|-------------|-------------|-------------|----------|
| CHD1        | Male        | 36.4434967  | 36.75757 |
|             | Male        | 36.8247514  |          |
|             | Male        | 37.00446701 |          |
|             | Female      | 5.796898365 | 5.640858 |
|             | Female      | 5.245229721 |          |
|             | Female      | 5.880445957 |          |
| NIPBL       | Male        | 31.58646393 | 31.54436 |
|             | Male        | 31.76962852 |          |
|             | Male        | 31.27700043 |          |
|             | Female      | 34.20628357 | 34.83852 |
|             | Female      | 34.60860825 |          |
|             | Female      | 35.70066071 |          |
| VIP         | Male        | 27.00       | 26.84354 |
|             | Male        | 26.89391327 |          |
|             | Male        | 26.63669586 |          |
|             | Female      | 32.46709824 | 32.78859 |
|             | Female      | 32.92311859 |          |
|             | Female      | 32.97555161 |          |
| HXC4        | Male        | 29.44915581 | 28.92547 |
|             | Male        | 28.71982193 |          |
|             | Male        | 28.60742378 |          |
|             | Female      | 31.13496017 | 30.96037 |
|             | Female      | 30.81520653 |          |
|             | Female      | 30.93094444 |          |
| MYP0        | Male        | 29.0953331  | 29.88831 |
|             | Male        | 30.05055618 |          |
|             | Male        | 30.51903343 |          |
|             | Female      | 34.57344437 | 34.67983 |
|             | Female      | 34.54977798 |          |
|             | Female      | 34.9162674  |          |

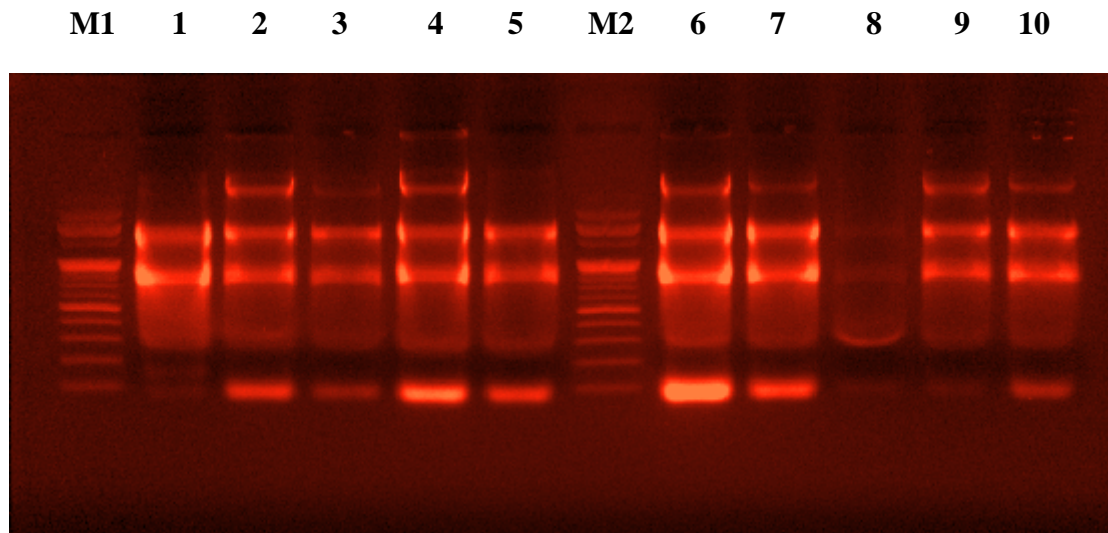

**Fig.S1. RNA extraction from male and female brain samples.**

**M1 and M2:** 100 bp marker  
**Load 1 to 5:** Male samples  
**Load 6 to 10:** Female samples

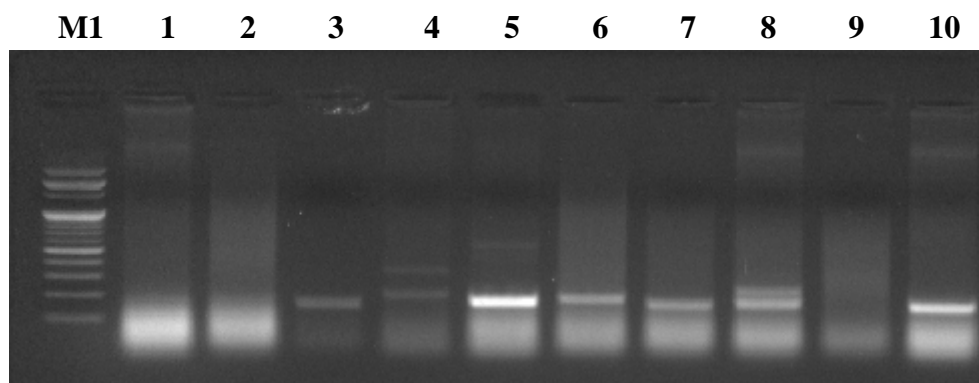

**Fig.S2. Expression of genes in male and female brain samples (Using Eppendorf Master cycler gradient)**

**M1:** 100 bp marker  
**Load 1 to 5:** Male samples  
**Load 6 to 10:** Female samples  
 [1 and 6: HXC4; 2 and 7: MYP0; 3 and 8: NIPBL; 4 and 10: VIP; 5 and 9: CHD1]
